# Supplementary material
Source: Springer Nature journal article supplement (https://www.springermedizin.de/resource/supplementary/12885_2012_3669_MOESM4_ESM.pdf/9465878)

**A**

### Anoikis assay MCF-7

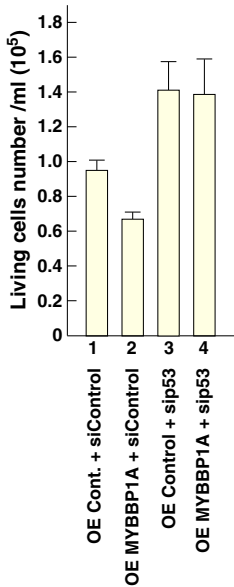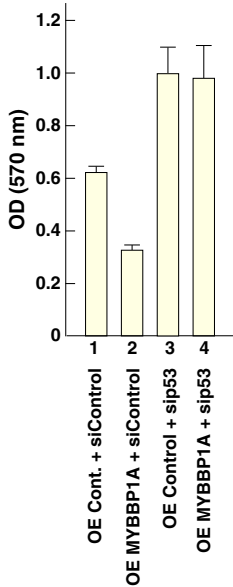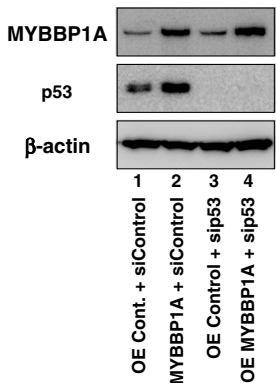**B**

### Anoikis assay ZR-75-1

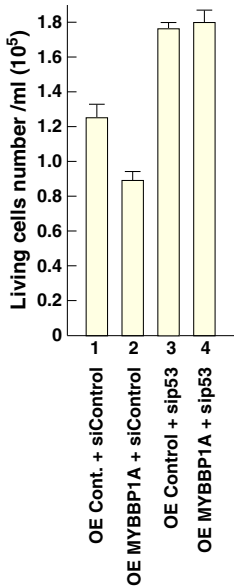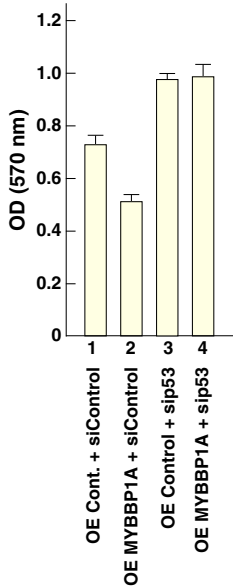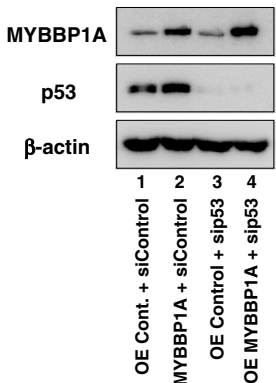

Supplement: MOESM4 [file 9465878]
